# Plant Species Loss Affects Life-History Traits of Aphids and Their Parasitoids

Jana S. Petermann<sup>1\*</sup><sup>‡</sup>, Christine B. Müller<sup>1†</sup>, Christiane Roscher<sup>2</sup>, Alexandra Weigelt<sup>3</sup><sup>‡</sup>, Wolfgang W. Weisser<sup>3</sup>, Bernhard Schmid<sup>1</sup>

**1** Institute of Evolutionary Biology and Environmental Studies, University of Zurich, Zurich, Switzerland, **2** Max Planck Institute for Biogeochemistry, Jena, Germany, **3** Institute of Ecology, University of Jena, Jena, Germany

## Abstract

The consequences of plant species loss are rarely assessed in a multi-trophic context and especially effects on life-history traits of organisms at higher trophic levels have remained largely unstudied. We used a grassland biodiversity experiment and measured the effects of two components of plant diversity, plant species richness and the presence of nitrogen-fixing legumes, on several life-history traits of naturally colonizing aphids and their primary and secondary parasitoids in the field. We found that, irrespective of aphid species identity, the proportion of winged aphid morphs decreased with increasing plant species richness, which was correlated with decreasing host plant biomass. Similarly, emergence proportions of parasitoids decreased with increasing plant species richness. Both, emergence proportions and proportions of female parasitoids were lower in plots with legumes, where host plants had increased nitrogen concentrations. This effect of legume presence could indicate that aphids were better defended against parasitoids in high-nitrogen environments. Body mass of emerged individuals of the two most abundant primary parasitoid species was, however, higher in plots with legumes, suggesting that once parasitoids could overcome aphid defenses, they could profit from larger or more nutritious hosts. Our study demonstrates that cascading effects of plant species loss on higher trophic levels such as aphids, parasitoids and secondary parasitoids begin with changed life-history traits of these insects. Thus, life-history traits of organisms at higher trophic levels may be useful indicators of bottom-up effects of plant diversity on the biodiversity of consumers.

**Citation:** Petermann JS, Müller CB, Roscher C, Weigelt A, Weisser WW, et al. (2010) Plant Species Loss Affects Life-History Traits of Aphids and Their Parasitoids. PLoS ONE 5(8): e12053. doi:10.1371/journal.pone.0012053

**Editor:** Mark Briffa, University of Plymouth, United Kingdom

**Received:** February 8, 2010; **Accepted:** July 12, 2010; **Published:** August 6, 2010

**Copyright:** © 2010 Petermann et al. This is an open-access article distributed under the terms of the Creative Commons Attribution License, which permits unrestricted use, distribution, and reproduction in any medium, provided the original author and source are credited.

**Funding:** The Jena Experiment is funded by the German Research Foundation (FOR 456, www.dfg.de) and supported by the Friedrich-Schiller-University of Jena (www.uni-jena.de) and the Max-Planck-Institute for Biogeochemistry, Jena (www.bgc-jena.mpg.de). Additional support was provided by the Swiss National Science Foundation (grant no. 31-65224-01 to BS, www.snf.ch). The funders had no role in study design, data collection and analysis, decision to publish, or preparation of the manuscript.

**Competing Interests:** The authors have declared that no competing interests exist.

\* E-mail: petermann@zoology.ubc.ca

<sup>‡</sup>a Current address: Department of Zoology, University of British Columbia, Vancouver, British Columbia, Canada

<sup>‡</sup>b Current address: Institute of Botany and Functional Biodiversity, University of Leipzig, Leipzig, Germany

† Deceased.

## Introduction

The consequences of the ongoing loss of plant species have been studied intensively, but rarely at other trophic levels than that of the plants themselves [1,2]. If plant species disappear from a multi-trophic system, it is conceivable that the effects of this loss of primary producers “cascade up” the system and cause changes at higher trophic levels. The first bottom-up cascades [3] were described from aquatic systems, but they have since been suggested to operate in a similar way in terrestrial systems [4]. Indeed, a few field and laboratory experiments have demonstrated terrestrial “community- and population-level” bottom-up cascades [4], such as effects of plant abundance and richness on the abundance and richness of herbivores or predators [5,6,7,8,9,10,11]. In contrast to these community- and population-level approaches, other studies examined cascading effects at the level of the individual organism (“individual-level cascades” [4]). These studies typically manipulated plant quality and measured effects on life-history traits of individuals at higher

trophic levels [12,13,14,15,16,17]. In this study, we hypothesize that changes in plant community diversity affect life-history traits of insects at higher trophic levels via changes in plant abundance and quality, effectively linking community- and individual-level cascades.

To address this hypothesis, we used aphid–parasitoid communities as a model system. The advantage of this system is that both aphids and their parasitic wasps have a relatively short range of movement, and due to their high degree of specialization are strongly dependent on the presence and quality of their host species [18,19,20,21]. Aphids often prefer single or few host plant species at least during part of their life cycle [18]. Once a winged (alate) aphid colonizer has reached such a host plant, a colony forms via asexual reproduction of non-winged (apterous) individuals. These remain rather immobile on the same plant individual. Wasps parasitize aphids by laying single eggs into their body [22]. The parasitoid larva feeds internally on the aphid until the aphid dies and forms a hard-shelled “mummy” in which the parasitoid larva pupates. The adult primary parasitoid emerges from the

mummy shortly after, unless it is itself parasitized by a secondary parasitoid. These secondary parasitoids attack the primary parasitoid either while the aphid is still alive (koinobiont “hyperparasitoids”) or when the aphid has developed into a mummy (idiobiont “mummy parasitoids”).

In this study, we recorded four life-history traits of aphids and their primary and secondary parasitoids that we expected to vary along a plant richness gradient: (1) the proportion of winged individuals in aphid colonies, (2) the emergence proportion of parasitoids, (3) the proportion of parasitoids that are female and (4) the body mass of the two most abundant parasitoids. Wings are a costly trait for aphids that has been associated with reduced fecundity and are therefore not constantly expressed [18,23]. The production of winged morphs in aphids has been suggested to serve two main purposes besides the obligatory change of host plant species in the life cycles of some species: firstly, the avoidance of deteriorating nutritional conditions, and secondly, the escape from predators [23,24,25,26]. While wing production is subject to intra- and interspecific variation [23], the proportion of winged aphids in a colony may reflect its nutritional or enemy environment which we anticipate to change with changing plant diversity.

Whether a parasitoid larva develops and emerges successfully from the aphid mummy as an adult depends amongst other things on aphid quality [27] and resistance [28,29]. Therefore, if changes in the plant community affect the aphids’ quality in terms of nutritional value, size or defensive abilities, these changes are expected to influence the proportion of successfully emerging parasitoids.

Parasitoid body mass is generally correlated with fitness [30,31], which has been shown to be controlled by host nutritional quality and especially by host size [e.g. 21,32]. Furthermore, some hymenopteran parasitoids are able to select the sex of their offspring at oviposition: fertilized eggs develop into females, unfertilized ones into males [30]. Because female parasitoids gain more from being large [33,34], female eggs are typically laid into the highest-quality hosts [33]. Thus, heavier parasitoids with a female-biased sex ratio could be expected to emerge in favorable environments.

In this study, we measured these life-history variables of aphids and parasitoids in experimental grassland communities varying in plant species richness and legume presence and show that (1) plant species loss has bottom-up cascading effects on life-history traits of organisms at higher trophic levels, (2) these cascades are mediated by diversity-related changes in host plant biomass and host plant nitrogen concentration.

## Methods

### Experimental design

This study was conducted as part of the Jena Experiment, a temperate grassland biodiversity experiment in Jena, Germany [35]. The experimental site is a floodplain area close to the river Saale, which was used for agricultural cropping before the experiment started in 2002. The site has not received fertilizer since then and is mown twice per year, a typical mowing regime of these grasslands. In the 3.5×3.5 m plots that were used for this study, nine dominant plant species from semi-natural, mesophilic grasslands were sown in 2002 as monocultures and mixtures (richness levels of 1, 2, 3, 4, 6, and 9 species [36]). The original species compositions were maintained by weeding at regular intervals [35]. The plots were arranged in four blocks with increasing distance to the river. Preliminary surveys showed that aphids could be regularly found on four of the nine species at the field site (*Anthriscus sylvestris*, *Arrhenatherum elatius*, *Phleum pratense* and *Trifolium pratense*, plant nomenclature follows Rothmaler [37]).

Hence, only plots containing at least one of these host plant species at a minimum abundance (>5% cover in May 2006) were used for this study (Table S1). These selection criteria resulted in an unbalanced design with fewer plots at the high plant-species richness end of the gradient. Therefore, we interpret our results with caution.

### Data collection

We identified and counted all aphids (a total of >16,000 individuals) that were part of an established colony on a host plant, including nymphs and winged morphs, in the same 0.2×3 m transect across the middle of the plots four times from May (first appearance of aphids at the field site) to August 2006 (hardly any aphids found after the fourth sampling period). All sampling campaigns were completed within about one week: two campaigns before the first mowing of the field site (around 2 June and 17 June) and two between the first and the second mowing (20 July and 2 August). Sampling was usually done in the mornings from a bench across the plots to avoid disturbing the vegetation and the aphid populations.

All parasitized aphids (mummies) encountered in the transects during sampling were collected. Additionally, all mummies in a surrounding plot area (usually 4 m<sup>2</sup>) were collected at the same time to be able to detect the full parasitoid community of a plot. A total of more than 3,500 mummies were collected, about one third of them from the transects. All mummies were placed individually in gelatin capsules in the field and were taken to the laboratory for rearing of the parasitoids. To induce parasitoid emergence, all mummies remaining after four months were subjected to a 3-month cold-warm-cold cycle with a minimum of 4°C. A total of about 2,000 parasitoids (about 1,700 primary parasitoids and 300 secondary parasitoids) emerged and were identified to species level. We individually weighed all 1,072 emerged individuals of the two most abundant parasitoid species (both primary parasitoid species) on a microbalance (Mettler Toledo MX5) to the nearest microgram after drying at 70°C for 2 days. Those two species were *Adialytus arvicola* (Stary), predominantly parasitizing the aphid *Sipha maydis* (aphid nomenclature follows Stresemann [38]) on the host plant *A. elatius*; and *Trioxys brevicornis* (Haliday), predominantly parasitizing the aphid *Cavariella aegopodii* on the host plant *A. sylvestris*.

The biomass of aphid host plants was determined by clipping the vegetation at a height of 3 cm in two 20×50 cm areas within each plot in May and August 2006. The harvested biomass was sorted into species, dried at 70°C for 48 h and weighed. The biomass data were averaged over the two sampling areas and summed up over the whole year. Nitrogen concentrations of aphid host plants were measured for each plant species from biomass samples harvested in May 2004 [39] in the same plots that were used for aphid counts or in replicate plots with the same plant composition.

### Data analysis

The proportion of winged aphid morphs was calculated separately for each aphid species by dividing the density of winged individuals by the total density of this species. Alatiform nymphs were rarely encountered and included as non-winged morphs; parasitized aphids were excluded. The proportion of winged aphids was arcsine square-root transformed to improve normality and homoscedasticity. The emergence proportion of parasitoids was calculated as the number of emerged parasitoids divided by the sum of emerged parasitoids and remaining mummies for each aphid species. This analysis was done at the level of the aphid species because in the case of failed emergence we could not confidently distinguish between primary and secondary parasitoids or identify their species. The proportion of female parasitoids was calculated for each parasitoid species by dividing the number of

**Table 1.** ANOVAs for host plant biomass and host plant nitrogen concentration.

|                                                                   | Host plant biomass |        |      |                   | Host plant nitrogen concentration |       |        |                   |   |
|-------------------------------------------------------------------|--------------------|--------|------|-------------------|-----------------------------------|-------|--------|-------------------|---|
|                                                                   | df                 | MS     | F    | P                 | df                                | MS    | F      | P                 |   |
| Plant species richness                                            | 1                  | 706360 | 17.3 | <b>0.0001</b>     | ↓ 1                               | 2.21  | 4.1    | <b>0.0482</b>     | ↑ |
| Legume presence                                                   | 1                  | 3422   | 0.1  | 0.7735            | 1                                 | 16.23 | 30.3   | <b>&lt;0.0001</b> | ↑ |
| Plotcode                                                          | 44                 | 40806  | 4.8  | <b>&lt;0.0001</b> | 43                                | 0.54  | 23.3   | <b>&lt;0.0001</b> |   |
| Host plant species (non-legume vs. legume)                        | 1                  | 488148 | 57.0 | <b>&lt;0.0001</b> | ↓ 1                               | 32.37 | 1407.3 | <b>&lt;0.0001</b> | ↑ |
| Host plant species (rest)                                         | 2                  | 13823  | 1.6  | 0.2061            | 2                                 | 0.78  | 34.0   | <b>&lt;0.0001</b> |   |
| Plant species richness×Host plant species (non-legume vs. legume) | 1                  | 261584 | 30.6 | <b>&lt;0.0001</b> | 1                                 | 0.01  | 0.3    | 0.5832            |   |
| Plant species richness×Host plant species (rest)                  | 2                  | 50123  | 5.9  | <b>0.0044</b>     | 2                                 | 0.01  | 0.3    | 0.7387            |   |
| Legume presence×Host plant species (rest)                         | 2                  | 19150  | 2.2  | 0.1142            | 1                                 | 0.03  | 1.2    | 0.2743            |   |
| Residuals                                                         | 71                 | 8558   |      |                   | 60                                | 0.02  |        |                   |   |

The term representing host plant species identity ("Host plant species") is split into two contrasts: "non-legume vs. legume" and the term containing the remaining variance from host plant species identity ("rest"). So for example (row 4), non-legume host plant species have a higher biomass than legume host plant species but other host plant species identity effects are not significant. "Plant species richness" and "Legume presence" were tested against "Plotcode", all other terms against "Residuals". Directions of significant main effects (with 1 df) are indicated by arrows. P-values < 0.05 are printed in bold. MS = mean square. doi:10.1371/journal.pone.0012053.t001

female individuals by the total number of emerged individuals of this species. One parasitoid species, *Lysiphlebus fabarum* (Marshall) which parasitized the aphid *Aphis scaliai* on the legume *T. pratense*, reproduces predominantly asexually in Europe [40] and was excluded from the analysis of proportions of females. All data were aggregated over the four census times.

We used multiple regression and ANOVA to analyze the data. Except for the proportion of winged aphid morphs the response variables were not transformed for the final analyses because model-checking procedures indicated that this was not necessary and analyses with transformed variables gave similar results. The biomass of aphid host plants (in g/m<sup>2</sup>) and their nitrogen concentration (in %) were used as covariables. All analyses were carried out with the statistical software R, version 2.7.2 [41].

## Results

### Plant-related variables

Overall, host plant biomass declined with increasing plant species richness (Table 1). Host plant nitrogen concentration increased with increasing plant species richness and was higher in legume (2.3±0.8%) than in non-legume plots (1.4±0.3%) and higher for legume (*T. pratense*: 2.9±0.5%) than for non-legume host plants (*A. sylvestris*: 2.0±0.4%, *A. elatius*: 1.2±0.3%, *P. pratense*: 1.3±0.3%). Plant species on which mummies of the two most abundant parasitoid species (*A. arvicola* and *T. brevicornis*) were found, also showed a decrease in biomass with increasing plant species richness ( $F_{1,24} = 16.6$ ,  $P < 0.001$ ). Their average biomass was higher in plots containing legumes (452±246 g/m<sup>2</sup>) than in plots from which legumes were absent (198±123 g/m<sup>2</sup>,  $F_{1,24} = 34.7$ ,  $P < 0.001$ ). However, their nitrogen concentration did not significantly increase with plant species richness ( $F_{1,18} = 1.15$ ,  $P = 0.297$ ).

### Proportion of winged aphids

Winged individuals were found in colonies of only four out of the ten aphid species (Table S2): *Aphis fabae*, *Cavariella aegopodi* (both mainly on the host plant *A. sylvestris*), *Diuraphis muehlei* (on the host plant *P. pratense*) and *Siphya maydis* (on the host plant *A. elatius*). The proportion of winged morphs declined with increasing plant

species richness, both for these four aphid species (Fig. 1) and when all aphid species were included in the analysis (Table 2). The biomass of the aphid host plants explained part of this effect:

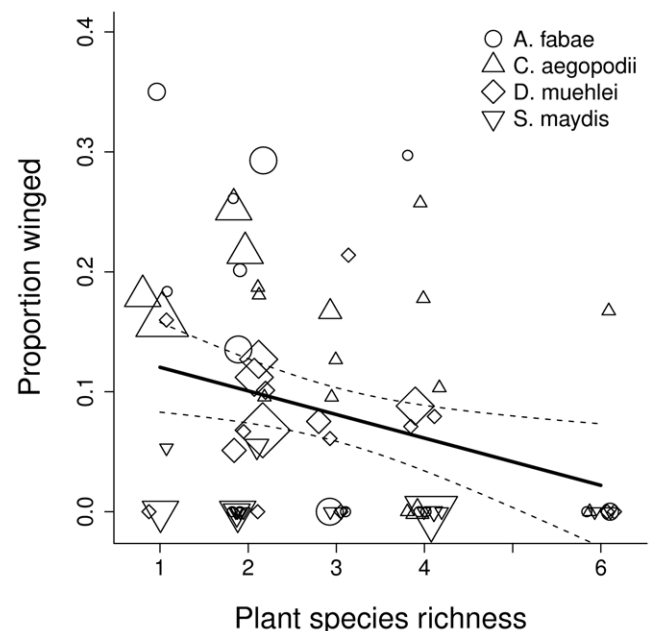

**Figure 1. Proportion of winged aphids as a function of plant species richness.** Only four aphid species produced winged morphs and are shown here: *A. fabae* (circles), *C. aegopodii* (up-facing triangles, both species mainly on the host plant species *A. sylvestris*) and *D. muehlei* (diamonds, on the host plant species *P. pratense*) and *S. maydis* (down-facing triangles, on the host plant species *A. elatius*). The size of the plotting symbol is proportional to the biomass (g/m<sup>2</sup>) of the host plant species of the respective aphid species in the respective plot. Host plant biomass below 200 g/m<sup>2</sup> is represented by a symbol with a fixed minimal size. Proportions of winged aphids are arcsine square-root transformed. 95% confidence intervals are shown around the regression line. doi:10.1371/journal.pone.0012053.g001

**Table 2.** ANOVAs for the proportion of winged aphids.

|                                       | a) without covariables |      |     |               | b) with covariables |      |      |               |   |
|---------------------------------------|------------------------|------|-----|---------------|---------------------|------|------|---------------|---|
|                                       | df                     | %SS  | F   | P             | df                  | %SS  | F    | P             |   |
| Host plant biomass                    |                        |      |     |               | 1                   | 13.2 | 29.6 | <0.0001       | ↑ |
| Host plant nitrogen concentration     |                        |      |     |               | 1                   | 0.1  | 0.2  | 0.6902        |   |
| Plant species richness                | 1                      | 7.0  | 7.1 | <b>0.0111</b> | 1                   | 4.1  | 3.9  | 0.0546        |   |
| Legume presence                       | 1                      | 0.0  | 0.0 | 0.9595        | 1                   | 0.1  | 0.1  | 0.7865        |   |
| Plotcode                              | 42                     | 41.9 | 2.1 | <b>0.0097</b> | 41                  | 42.5 | 2.3  | <b>0.0082</b> |   |
| Aphid identity                        | 9                      | 27.4 | 6.3 | <0.0001       | 9                   | 23.2 | 5.8  | <b>0.0001</b> |   |
| Plant species richness×Aphid identity | 6                      | 2.1  | 0.7 | 0.6386        | 6                   | 2.4  | 0.9  | 0.4996        |   |
| Legume presence×Aphid identity        | 4                      | 0.9  | 0.5 | 0.7436        | 3                   | 0.7  | 0.5  | 0.6687        |   |
| Residuals                             | 43                     | 20.7 |     |               | 31                  | 13.8 |      |               |   |

Proportions were arcsine square-root transformed prior to analyses. The first analysis (a) was done without covariables, the second analysis (b) with biomass and nitrogen concentration of aphid host plants as covariables. "Plant species richness" and "Legume presence" were tested against "Plotcode", all other terms against "Residuals". Directions of significant effects of the covariables are indicated by arrows. P-values<0.05 are printed in bold. % SS = percent sum of squares explained. doi:10.1371/journal.pone.0012053.t002

higher host plant biomass had an increasing effect on the proportion of winged aphids, but since host plant biomass declined with plant species richness, the proportion of winged individuals declined as well. Aphid load (aphid density per host plant biomass,  $F_{1,28} = 0.083$ ,  $P = 0.775$ ) did not have a significant effect on the proportions of winged aphids. Parasitoid density in the plots had a positive effect on the proportions of winged aphids ( $F_{1,28} = 12.654$ ,  $P = 0.001$ , respectively).

### Parasitoid emergence

The proportion of emerged parasitoids declined with increasing plant species richness. Furthermore, the proportion was lower in plots containing legumes. However, the latter was largely due to the fact that parasitoids of aphid species with legume host plants showed very low emergence proportions (Fig. 2, Table 3). Host plant nitrogen concentration had a significant negative effect on emergence (Table 3). When considering only aphid species that were hosts for the two most abundant parasitoids, *A. arvicola* and *T. brevicornis* (mummies only on non-legume host plants), emergence proportions were similar in legume and non-legume plots ( $F_{1,25} = 0.029$ ,  $P = 0.867$ ).

### Proportion of female parasitoids

The proportion of female parasitoids was lower in the presence of legumes, irrespective of the trophic level or species identity of the parasitoid (Fig. 3, Table 4). Host plant biomass had a significant negative effect on the proportion of female parasitoids and explained part of the negative legume effect (Table 4). There was no significant legume effect for the two most abundant parasitoids, *A. arvicola* and *T. brevicornis* ( $F_{1,24} = 0.528$ ,  $P = 0.475$ ).

### Parasitoid body mass

The body mass of the two most abundant parasitoids, *A. arvicola* and *T. brevicornis* was similar across all plant species richness levels but was higher in the presence of legumes for males and females of both parasitoid species (Figs. 4 and S1, Table 5). Because both species emerged only from mummies on non-legume host plants, these effects were indirect: they were largely due to increased biomass and nitrogen concentration of these non-legume host plants in plots containing legumes.

## Discussion

Our results demonstrate that plant species richness and the presence of legumes in plant communities affect the life history of aphids and their parasitoids both directly and indirectly via host plant biomass and nitrogen concentration. These effects are paralleled by community-level cascading effects of plant species richness on species richness and densities of aphids and

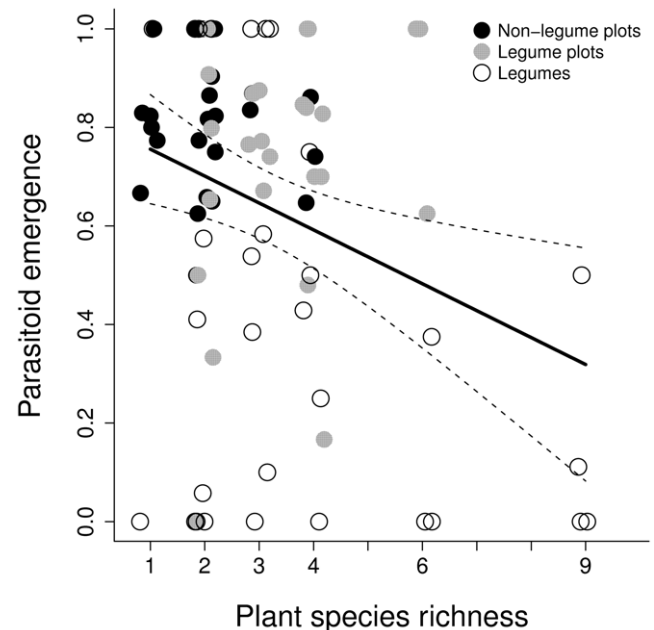

**Figure 2. Parasitoid emergence proportion as a function of plant species richness.** Closed black symbols depict parasitoids emerged from mummies on non-legume host plants (*A. sylvestris*, *A. elatius*, *P. pratense*) growing in plant communities without legumes, grey symbols depict parasitoids emerged from mummies on those non-legume host plant species in plant communities with legumes and open symbols depict parasitoids emerged from mummies on a legume host plant (*T. pratense*). The regression line (shown with 95% confidence intervals) was fitted to all data points. doi:10.1371/journal.pone.0012053.g002

**Table 3.** ANOVAs for the parasitoid emergence proportion.

|                                       | a) without covariables |      |      |               | b) with covariables |      |      |                 |
|---------------------------------------|------------------------|------|------|---------------|---------------------|------|------|-----------------|
|                                       | df                     | %SS  | F    | P             | df                  | %SS  | F    | P               |
| Host plant biomass                    |                        |      |      |               | 1                   | 1.4  | 1.4  | 0.2591          |
| Host plant nitrogen concentration     |                        |      |      |               | 1                   | 18.6 | 17.6 | <b>0.0007</b> ↓ |
| Plant species richness                | 1                      | 8.9  | 10.4 | <b>0.0024</b> | 1                   | 5.9  | 7.4  | <b>0.0092</b>   |
| Legume presence                       | 1                      | 5.5  | 6.4  | <b>0.0149</b> | 1                   | 0.0  | 0.1  | 0.8075          |
| Plotcode                              | 44                     | 37.7 | 1.2  | 0.3621        | 43                  | 33.9 | 0.7  | 0.7818          |
| Aphid identity                        | 6                      | 23.6 | 5.3  | <b>0.0014</b> | 6                   | 16.2 | 2.6  | 0.0629          |
| Plant species richness×Aphid identity | 4                      | 4.9  | 1.7  | 0.1941        | 4                   | 5.4  | 1.3  | 0.3198          |
| Legume presence×Aphid identity        | 2                      | 1.6  | 1.1  | 0.3523        | 1                   | 1.6  | 1.5  | 0.2433          |
| Residuals                             | 24                     | 17.8 |      |               | 16                  | 16.9 |      |                 |

The first analysis (a) was done without covariables, the second analysis (b) with biomass and nitrogen concentration of aphid host plants as covariables. "Plant species richness" and "Legume presence" were tested against "Plotcode", all other terms against "Residuals". Directions of significant effects of the covariables are indicated by arrows. P-values < 0.05 are printed in bold. % SS = percent sum of squares explained. doi:10.1371/journal.pone.0012053.t003

their parasitoids that we reported previously from the same field site [11].

### Proportion of winged aphids

The proportion of winged aphids decreased with increasing plant species richness, partly as a result of a simultaneous decrease in aphid host plant biomass. Whereas low host plant abundance typically has a negative effect on herbivore densities [5,6,11,42], the proportion of winged individuals was expected to rise with resource limitation since wing production after the initial colonization period in early spring is a strategy to escape deteriorating conditions by dispersing [23,25]. In addition to the unexpected direction of the effect, we found no influence of crowding (aphid load) or of plant quality (in terms of plant nitrogen concentration) on winged morph production, suggesting that limited resource availability was not the cause for decreasing proportions of winged morphs with increasing plant species richness. However, Züst et al. [43] suggested that resources might sometimes be too low to induce wing production at all. So the resource-limitation argument could be reversed to explain the extremely low proportions of winged aphids in communities with high plant species richness and low host plant biomass. Parasitoid density had an increasing effect on aphid wing production indicating that increased pressure from natural enemies might have played a role in this context. However, we found relevant proportions of winged individuals in only four aphid species. It has been shown that intra- and interspecific variation in wing induction can be very large [23]. Furthermore, other abiotic effects that we did not measure (e.g. temperature) may be important triggers [23], cautioning against drawing strong conclusions from the results.

### Parasitoid emergence and proportion of female parasitoids

Emergence proportions of parasitoids similarly decreased with increasing plant species richness. However, our design was unbalanced, because of a disproportionately low number of plant communities at high species richness levels. Therefore, we have to interpret our results with caution. Both emergence proportions and proportions of females were lower in plant communities containing legumes compared with legume-free communities.

These relationships were partially explained by changes in host-plant nitrogen concentration (parasitoid emergence) and in host plant biomass (proportion of females).

Plant nitrogen concentrations, which are often increased even in non-legumes by the presence of nitrogen-fixing legumes [44,45], can have positive or negative effects on higher trophic levels. On the one hand, plants with higher nitrogen concentrations may be more nutritious for herbivores, which are generally nitrogen-limited [46,47,48,49]. On the other hand, nutrient availability is known to affect plant allocation to secondary metabolites [50,51] and plants may use surplus nitrogen to produce higher levels of nitrogen-based defense compounds [51,52]. One trophic level above herbivores, the same dichotomy may become apparent. Natural enemies of herbivores are even more strongly limited by nitrogen than the

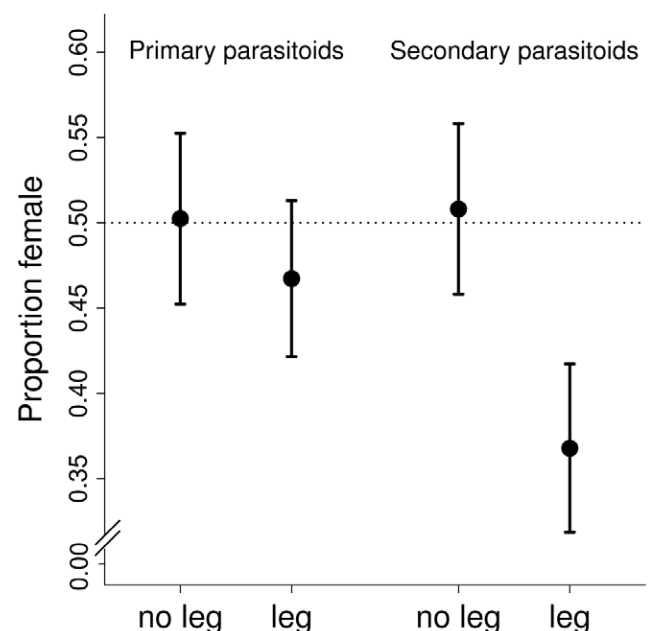

**Figure 3.** Proportion of female primary and secondary parasitoids in communities with and without legumes. The dashed line shows the 1:1 sex ratio. doi:10.1371/journal.pone.0012053.g003

**Table 4.** ANOVAs for the proportion of female parasitoids.

|                                            | a) without covariables |      |     |               | b) with covariables |      |     |               |   |
|--------------------------------------------|------------------------|------|-----|---------------|---------------------|------|-----|---------------|---|
|                                            | df                     | %SS  | F   | P             | df                  | %SS  | F   | P             |   |
| Host plant biomass                         |                        |      |     |               | 1                   | 3.6  | 6.5 | <b>0.0148</b> | ↓ |
| Host plant nitrogen concentration          |                        |      |     |               | 1                   | 1.6  | 2.9 | 0.0988        |   |
| Plant richness                             | 1                      | 0.7  | 0.9 | 0.3461        | 1                   | 0.8  | 0.9 | 0.3432        |   |
| Legume presence                            | 1                      | 3.3  | 4.3 | <b>0.0452</b> | 1                   | 0.3  | 0.3 | 0.5732        |   |
| Plotcode                                   | 39                     | 30.1 | 1.6 | 0.0555        | 37                  | 30.9 | 1.5 | 0.1081        |   |
| Trophic level                              | 1                      | 0.0  | 0.0 | 0.9736        | 1                   | 0.4  | 0.8 | 0.3735        |   |
| Parasitoid identity                        | 18                     | 20.5 | 2.3 | <b>0.0077</b> | 18                  | 22.3 | 2.2 | <b>0.0191</b> |   |
| Plant species richness×Trophic level       | 1                      | 0.0  | 0.0 | 0.9086        | 1                   | 0.1  | 0.1 | 0.7182        |   |
| Plant species richness×Parasitoid identity | 15                     | 7.1  | 1.0 | 0.5051        | 14                  | 10.1 | 1.3 | 0.2496        |   |
| Legume presence×Trophic level              | 1                      | 0.1  | 0.1 | 0.7156        | 1                   | 0.2  | 0.4 | 0.5296        |   |
| Legume presence×Parasitoid identity        | 12                     | 7.9  | 1.3 | 0.2216        | 12                  | 9.2  | 1.4 | 0.2157        |   |
| Residuals                                  | 62                     | 30.4 |     |               | 37                  | 20.5 |     |               |   |

The first analysis (a) was done without covariables, the second analysis (b) with biomass and nitrogen concentration of aphid host plants as covariables. "Plant species richness" and "Legume presence" were tested against "Plotcode", all other terms against "Residuals". "Trophic level" signifies the contrast between primary and secondary parasitoids. Directions of significant effects of the covariables are indicated by arrows. P-values < 0.05 are printed in bold. % SS = percent sum of squares explained.

doi:10.1371/journal.pone.0012053.t004

herbivores themselves [53,54] and might do better on nitrogen-rich hosts. However, some herbivores can use nitrogen-based plant compounds or simply their own high nutritional status on nitrogen-rich host plants to mount defenses against predators and parasitoids [55,56]. While some of the early defense reactions (encapsulation and abortion of parasitoid eggs) probably went unnoticed in our study, the lower parasitoid emergence success on nitrogen-rich host plants could still be due to increased aphid defenses.

Since mated parasitoid females can determine the sex of their offspring at oviposition [30], we speculate that they might have sensed a potentially different host quality and avoided "wasting" females on risky hosts. On the other hand, the parasitoid sexes might have differential mortality [30], with female larvae more prone to abortion as a result of lower host quality, potentially explaining the lower emergence success in legume plots. Interestingly, even secondary parasitoids showed the effect of legumes on the proportions of females, implying a cascade to the third trophic level above the plants.

### Parasitoid body mass

In contrast to general parasitoid emergence and proportions of females, the body mass of the two most abundant primary parasitoids, *A. arvicola* and *T. brevicornis*, was higher in the presence of legumes in the plant community. Host plant nitrogen concentration and host plant biomass had a positive effect in this case. Since we did not find a negative effect of legume presence on emergence or the proportion of females in these two species, we conclude that they might be resistant to potentially increased aphid defenses in legume plots. This resistance may even explain their high abundance at our field site. The two species seemed to instead profit from the presence of legumes. We did not measure aphid body mass or nitrogen content and hence have no conclusive evidence for either higher nitrogen content of hosts [53,54,57] or larger host size indeed mediating higher parasitoid body mass in communities with legumes. Another field experiment found a higher body-mass gain of herbivores (grasshoppers) in legume-containing plant communities [58]. Since host size is

typically strongly correlated with parasitoid size [59], a size-mediated effect seems plausible.

### Conclusions

We found considerable effects of plant species richness and community composition cascading up the food web to affect aphid and parasitoid life-history traits. Legumes exerted a particularly

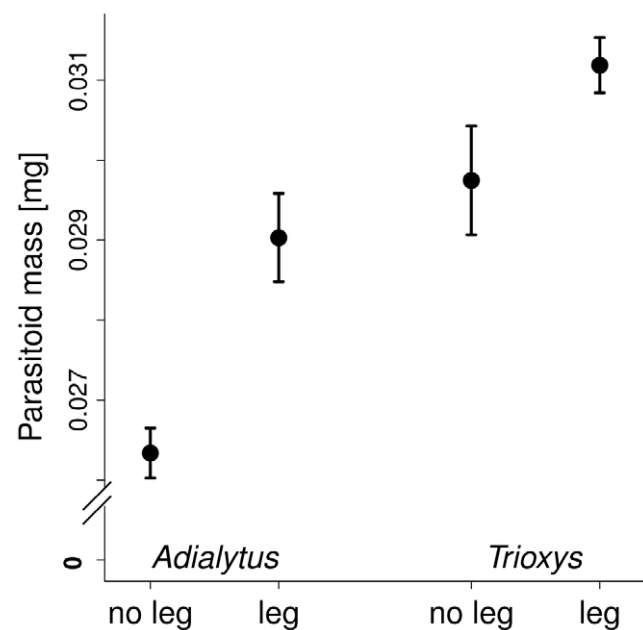

**Figure 4.** Body mass of two primary parasitoids in plant communities with and without legumes. Average dry mass of the two most abundant primary parasitoids *A. arvicola* and *T. brevicornis* ± standard error (mg) in plots without legumes ("no leg") and with legumes ("leg"). Both parasitoid species developed only in aphids on non-legume host plant species (*A. elatius* and *A. sylvestris*, respectively). doi:10.1371/journal.pone.0012053.g004



**Table 5.** ANOVAs for the body mass of the two most abundant primary parasitoid species (*A. arvicola* and *T. brevicornis*).

|                                            | a) without covariables |      |      |               | b) with covariables |      |      |               |   |
|--------------------------------------------|------------------------|------|------|---------------|---------------------|------|------|---------------|---|
|                                            | df                     | %SS  | F    | P             | df                  | %SS  | F    | P             |   |
| Host plant biomass                         |                        |      |      |               | 1                   | 6.1  | 67.1 | <0.0001       | ↑ |
| Host plant nitrogen concentration          |                        |      |      |               | 1                   | 2.5  | 27.4 | <0.0001       | ↑ |
| Plant species richness                     | 1                      | 0.3  | 1.4  | 0.2452        | 1                   | 0.8  | 2.7  | 0.1228        |   |
| Legume presence                            | 1                      | 7.7  | 34.6 | <0.0001       | 1                   | 0.6  | 2.2  | 0.1584        |   |
| Parasitoid identity                        | 1                      | 1.7  | 7.7  | <b>0.0103</b> | 1                   | 1.1  | 3.9  | 0.0664        |   |
| Plant species richness×Parasitoid identity | 1                      | 0.2  | 0.7  | 0.4190        | 1                   | 0.1  | 0.5  | 0.5017        |   |
| Legume presence×Parasitoid identity        | 1                      | 0.0  | 0.1  | 0.7088        | 1                   | 0.2  | 0.8  | 0.3812        |   |
| Plotcode                                   | 24                     | 5.3  | 2.6  | <b>0.0001</b> | 16                  | 4.7  | 3.2  | <0.0001       |   |
| Sex                                        | 1                      | 2.8  | 32.8 | <0.0001       | 1                   | 2.4  | 26.3 | <0.0001       |   |
| Plant species richness×Sex                 | 1                      | 0.1  | 1.7  | 0.1917        | 1                   | 0.2  | 1.7  | 0.1894        |   |
| Legume presence×Sex                        | 1                      | 0.2  | 2.0  | 0.1551        | 1                   | 0.2  | 2.3  | 0.1297        |   |
| Parasitoid identity×Sex                    | 1                      | 0.7  | 8.5  | <b>0.0036</b> | 1                   | 0.5  | 5.9  | <b>0.0158</b> |   |
| Residuals                                  | 936                    | 80.9 |      |               | 877                 | 80.5 |      |               |   |

The first analysis (a) was done without covariables, the second analysis (b) with biomass and nitrogen concentration of aphid host plants as covariables. Both parasitoid species developed only in aphids on non-legume host plant species. The covariables and "Sex" (incl. all interactions with "Sex") were tested against "Residuals", all other terms against "Plotcode". "Parasitoid identity" was tested at the "Plotcode" level in this analysis because in almost all cases only one of the two species was present in a plot. Directions of significant effects of the covariables are indicated by arrows. P-values<0.05 are printed in bold. % SS=percent sum of squares explained. doi:10.1371/journal.pone.0012053.t005

strong effect in some cases. This plant functional group had an impact up to the highest trophic level considered in this study, sometimes mediated via an additional interaction at the plant level, thus affecting even insect communities on non-legume host plants.

In contrast, we found only plant-species richness effects but no effects of legume presence on aphid and parasitoid richness and densities in a community-level study at the same field site [11], underlining the importance of life-history studies to detect different pathways of effects of plant species loss on associated biodiversity. This difference in the effect of legume presence between the two studies may indicate that cascading bottom-up effects on insect life-history traits are more strongly resource-quality mediated, whereas cascading effects on insect species richness and density seem to be rather mediated by abundance and richness of lower trophic levels. On the other hand, it is possible that insect life-history studies detect effects of plant species loss at an earlier stage than richness or abundance studies. Similar observations have been made in analyses of vegetation responses to habitat change, where life-history changes could be used as early indicators [60].

The altered life-history traits of aphids and parasitoids are expected to eventually result in altered species abundances and richness at these consumer trophic levels. One example for this link is the apparently low suitability of species-rich plant communities for parasitoids. In the present study, we found for example lower emergence success, potentially due to increased aphid defenses. These are paralleled by low parasitoid densities and species richness [11], possibly a result of reduced parasitoid reproduction. We therefore advocate the additional examination of individual-level cascades to predict and explain population- and community-level cascades of plant species loss on higher trophic levels.

## Supporting Information

**Figure S1** Body mass of two primary parasitoids in communities with and without legumes. Average dry mass of a) females and b) males of the two most abundant primary parasitoids *A. arvicola* and *T. brevicornis* ± standard error (mg) in plots without legumes ("no

leg") and with legumes ("leg"). Both parasitoid species developed only in aphids on non-legume host plant species (*A. elatius* and *A. sylvestris*, respectively).

Found at: doi:10.1371/journal.pone.0012053.s001 (0.06 MB TIF)

**Table S1** List of all 47 sampled plots. For each plot, block number, plot number, plant species richness, the presence of legumes, the presence of the nine plant species in the plant assemblage and the total host plant biomass (sum across all aphid host plant species and both harvests in 2006) are given. In some cases, two replicate plots with the same plant composition were used. The presence of a plant species refers to its presence in the seed mixture at plot establishment in 2002, independent of its actual abundance through 2006. Only the first four plant species hosted aphids in our study. *Ant*: *Anthriscus sylvestris*, *Arr*: *Arrhenatherum elatius*, *Phl*: *Phleum pratense*, *Tri p*: *Trifolium pratense*, *Alo*: *Alopecurus pratensis*, *Dac*: *Dactylis glomerata*, *Ger*: *Geranium pratense*, *Poa*: *Poa trivialis*, *Tri r*: *Trifolium repens*.

Found at: doi:10.1371/journal.pone.0012053.s002 (0.07 MB DOC)

**Table S2** List of plant and insect species. For each species, average densities (biomass in g per m<sup>2</sup> for plants, individuals per m<sup>2</sup> for aphids and parasitoids, sums over all sampling dates) are given. Furthermore, proportions of winged aphids, proportions of emerged parasitoids, proportions of female parasitoids and parasitoid body mass (mg) across all respective plots are given. All means are shown ±1 standard error. Plant nomenclature follows Rothmaler [1], aphid nomenclature follows Stresemann [2]. Authorities for parasitoids are given in parentheses behind species names. Two rare aphid species and one rare parasitoid species could not be identified due to the lack of material and were assigned to morphospecies. Three species of *Alloxysta* have not been described and were given provisional names (Frank van Veen, personal communication). excl.: *Lysiphlebus fabarum* reproduces asexually in Europe (i.e. the proportion of females is always 1) and was excluded from the analysis of proportions of females; n.a.: not available (*Aphis fabae* and the unidentified aphid species

were never parasitized in our study; the sex of the unidentified parasitoids could not be determined). References: 1. Rothmaler R (2002) Exkursionsflora von Deutschland; Jäger EJ, Werner K, editors. Heidelberg-Berlin: Spektrum. 2. Stresemann E (1994) Exkursionsfauna von Deutschland, Wirbellose: Insekten- 2.Teil. Jena: Gustav Fischer Verlag.

Found at: doi:10.1371/journal.pone.0012053.s003 (0.06 MB DOC)

## References

- Duffy JE, Cardinale BJ, France KE, McIntyre PB, Thebault E, et al. (2007) The functional role of biodiversity in ecosystems: incorporating trophic complexity. *Ecol Lett* 10: 522–538.
- Schmid B, Balvanera P, Cardinale BJ, Godbold J, Pfisterer AB, et al. (2009) Consequences of species loss for ecosystem functioning: meta-analyses of data from biodiversity experiments. In: Naeem S, Bunker DE, Hector A, Loreau M, Perrings C, eds. *Biodiversity, Ecosystem Functioning, and Human Wellbeing: An Ecological and Economic Perspective*. Oxford: Oxford University Press. pp 14–29.
- Hunter MD, Price PW (1992) Playing chutes and ladders: Heterogeneity and the relative roles of bottom-up and top-down forces in natural communities. *Ecology* 73: 724–732.
- Kagata H, Ohgushi T (2006) Bottom-up trophic cascades and material transfer in terrestrial food webs. *Ecol Res* 21: 26–34.
- Haddad NM, Tilman D, Haarstad J, Ritchie M, Knops JMH (2001) Contrasting effects of plant richness and composition on insect communities: A field experiment. *Am Nat* 158: 17–35.
- Knops JMH, Tilman D, Haddad NM, Naeem S, Mitchell CE, et al. (1999) Effects of plant species richness on invasion dynamics, disease outbreaks, insect abundances and diversity. *Ecol Lett* 2: 286–293.
- Siemann E, Tilman D, Haarstad J, Ritchie M (1998) Experimental tests of the dependence of arthropod diversity on plant diversity. *Am Nat* 152: 738–750.
- Dyer LA, Stireman JO (2003) Community-wide trophic cascades and other indirect interactions in an agricultural community. *Basic Appl Ecol* 4: 423–432.
- Gange AC, Brown VK, Aplin DM (2003) Multitrophic links between arbuscular mycorrhizal fungi and insect parasitoids. *Ecol Lett* 6: 1051–1055.
- Aquilino KM, Cardinale BJ, Ives AR (2005) Reciprocal effects of host plant and natural enemy diversity on herbivore suppression: an empirical study of a model tritrophic system. *Oikos* 108: 275–282.
- Petermann JS, Müller CB, Weigelt A, Weisser WW, Schmid B (2010) Effects of plant species loss on aphid-parasitoid communities. *J Anim Ecol* 79: 709–720.
- Harvey JA, van Dam NM, Gols R (2003) Interactions over four trophic levels: foodplant quality affects development of a hyperparasitoid as mediated through a herbivore and its primary parasitoid. *J Anim Ecol* 72: 520–531.
- Soler R, Bezemer TM, van der Putten WH, Vet LEM, Harvey JA (2005) Root herbivore effects on above-ground herbivore, parasitoid and hyperparasitoid performance via changes in plant quality. *J Anim Ecol* 74: 1121–1130.
- Wurst S, Jones TH (2003) Indirect effects of earthworms (*Aporrectodea caliginosa*) on an above-ground tritrophic interaction. *Pedobiologia* 47: 91–97.
- de Sassi C, Müller CB, Krauss J (2006) Fungal plant endosymbionts alter life history and reproductive success of aphid predators. *Proceedings of the Royal Society B* 273: 1301–1306.
- Häri SA, Krauss J, Müller CB (2008) Trophic cascades initiated by fungal plant endosymbionts impair reproductive performance of parasitoids in the second generation. *Oecologia* 157: 399–407.
- Häri SA, Krauss J, Müller CB (2008) Fungal endosymbionts of plants reduce lifespan of an aphid secondary parasitoid and influence host selection. *Proceedings of the Royal Society B* 275: 2627–2632.
- Dixon AFG (1998) *Aphid Ecology*. London: Chapman and Hall.
- Dixon AFG, Kindlmann P, Leps J, Holman J (1987) Why there are so few species of aphids, especially in the tropics. *Am Nat* 129: 580–592.
- van Veen FJF, Müller CB, Pell JK, Godfray HCJ (2008) Food web structure of three guilds of natural enemies: predators, parasitoids and pathogens of aphids. *J Anim Ecol* 77: 191–200.
- Bukovinsky T, van Veen FJF, Jongema Y, Dicke M (2008) Direct and indirect effects of resource quality on food web structure. *Science* 319: 804–807.
- Völkl W, Mackauer M, Pell JK, Brodeur J (2007) Predators, parasitoids and pathogens. In: Van Emden HF, Harrington RH, eds. *Aphids as Crop Pests*. Oxford: CAB International. pp 187–233.
- Müller CB, Williams IS, Hardie J (2001) The role of nutrition, crowding and interspecific interactions in the development of winged aphids. *Ecol Entomol* 26: 330–340.
- Sloggett JJ, Weisser WW (2002) Parasitoids induce production of the dispersal morph of the pea aphid, *Acyrtosiphon pisum*. *Oikos* 98: 323–333.
- Sutherland ORW (1967) Role of host plant in production of winged forms by a green strain of pea aphid *Acyrtosiphon pisum* Harris. *Nature* 216: 387–388.
- Weisser WW, Braendle C, Minorette N (1999) Predator-induced morphological shift in the pea aphid. *Proceedings of the Royal Society B* 266: 1175–1182.
- Ashouri A, Michaud D, Cloutier C (2001) Recombinant and classically selected factors of potato plant resistance to the Colorado potato beetle, *Leptinotarsa decemlineata*, variously affect the potato aphid parasitoid *Aphidius nigripes*. *Biocontrol* 46: 401–418.
- Ferrari J, Müller CB, Kraaijeveld AR, Godfray HCJ (2001) Clonal variation and covariation in aphid resistance to parasitoids and a pathogen. *Evolution* 55: 1805–1814.
- Li S, Falabella P, Giannantonio S, Fanti P, Battaglia D, et al. (2002) Pea aphid clonal resistance to the endophagous parasitoid *Aphidius ervi*. *J Insect Physiol* 48: 971–980.
- Godfray HCJ (1994) *Parasitoids: Behavioral and Evolutionary Ecology*; Krebs J, Clutton-Brock TH, eds. Princeton, New Jersey: Princeton University Press.
- Visser ME (1994) The importance of being large: The relationship between size and fitness in females of the parasitoid *Aphaereta minuta* (Hymenoptera: Braconidae). *J Anim Ecol* 63: 963–978.
- Sequeira R, Mackauer M (1992) Nutritional ecology of an insect host-parasitoid association: The pea aphid-*Aphidius ervi* system. *Ecology* 73: 183–189.
- Charnov EL, Los-den Hartogh RL, Jones WT, van den Assem J (1981) Sex ratio evolution in a variable environment. *Nature* 289: 27–33.
- Ueno T (1999) Host-size-dependent sex ratio in a parasitoid wasp. *Researches on Population Ecology* 41: 47–57.
- Roscher C, Schumacher J, Baade J, Wilcke W, Gleixner G, et al. (2004) The role of biodiversity for element cycling and trophic interactions: an experimental approach in a grassland community. *Basic Appl Ecol* 5: 107–121.
- Roscher C, Temperton VM, Scherer-Lorenzen M, Schmitz M, Schumacher J, et al. (2005) Overyielding in experimental grassland communities - irrespective of species pool or spatial scale. *Ecol Lett* 8: 419–429.
- Rothmaler R (2002) *Exkursionsflora von Deutschland*; Jäger EJ, Werner K, eds. Heidelberg-Berlin: Spektrum.
- Stresemann E (1994) *Exkursionsfauna von Deutschland, Wirbellose: Insekten- 2.Teil*. Jena: Gustav Fischer Verlag.
- Roscher C, Thein S, Schmid B, Scherer-Lorenzen M (2008) Complementary nitrogen use among potentially dominant species in a biodiversity experiment varies between two years. *J Ecol* 96: 477–488.
- Belshaw R, Quicke DLJ, Völkl W, Godfray HCJ (1999) Molecular markers indicate rare sex in a predominantly asexual parasitoid wasp. *Evolution* 53: 1189–1199.
- R Development Core Team (2008) *R: A Language and Environment for Statistical Computing*. 2.7.2 ed. Vienna, Austria: Foundation for Statistical Computing.
- Otway SJ, Hector A, Lawton JH (2005) Resource dilution effects on specialist insect herbivores in a grassland biodiversity experiment. *J Anim Ecol* 74: 234–240.
- Züst T, Häri SA, Müller CB (2008) Endophytic fungi decrease available resources for the aphid *Rhopalosiphum padi* and impair their ability to induce defences against predators. *Ecol Entomol* 33: 80–85.
- Temperton VM, Mwangi PN, Scherer-Lorenzen M, Schmid B, Buchmann N (2007) Positive interactions between nitrogen-fixing legumes and four different neighbouring species in a biodiversity experiment. *Oecologia* 151: 190–205.
- Wacker L, Baudois O, Eichenberger-Glinz S, Schmid B (2009) Effects of plant species richness on stand structure and productivity. *Journal of Plant Ecology* 2: 95–106.
- Lawton JH, McNeill S (1979) Between the devil and the deep blue sea: on the problems of being a herbivore. In: Anderson RM, Turner BD, Taylor LR, eds. *Population dynamics*. Oxford: Blackwell Scientific. pp 223–244.
- White TCR (1984) The abundance of invertebrate herbivores in relation to the availability of nitrogen in stressed food plants. *Oecologia* 63: 90–105.
- Davidson AW, Potter DA (1995) Response of plant-feeding, predatory, and soil-inhabiting invertebrates to *Acremonium* endophyte and nitrogen-fertilization in tall fescue turf. *J Econ Entomol* 88: 367–379.
- Kempel A, Brandl R, Schadler M (2009) Symbiotic soil microorganisms as players in aboveground plant-herbivore interactions - the role of rhizobia. *Oikos* 118: 634–640.

## Acknowledgments

We thank Ernst-Detlef Schulze for scientific input at the start of the Jena Experiment, Anne Hausteiner for fieldwork assistance, all gardeners and student helpers for the maintenance of the field site and Frank van Veen for help with parasitoid identification. Comments by Simone Häri and two reviewers greatly improved the manuscript.

## Author Contributions

Conceived and designed the experiments: JSP CBM WW BS. Performed the experiments: JSP CBM CR AW. Analyzed the data: JSP BS. Wrote the paper: JSP CR AW BS.



50. Bryant JP, Chapin FS, Klein DR (1983) Carbon/nutrient balance of boreal plants in relation to vertebrate herbivory. *Oikos* 40: 357–368.
51. Mattson WJ (1980) Herbivory in relation to plant nitrogen content. *Annual Review of Ecology and Systematics* 11: 119–161.
52. Lyons PC, Plattner RD, Bacon CW (1986) Occurrence of peptide and clavine ergot alkaloids in tall fescue grass. *Science* 232: 487–489.
53. Mayntz D, Toft S (2001) Nutrient composition of the prey's diet affects growth and survivorship of a generalist predator. *Oecologia* 127: 207–213.
54. Fagan WF, Siemann E, Mitter C, Denno RF, Huberty AF, et al. (2002) Nitrogen in insects: Implications for trophic complexity and species diversification. *Am Nat* 160: 784–802.
55. Francis F, Lognay G, Wathelet J-P, Haubruge E (2001) Effects of allelochemicals from first (*Brassicaceae*) and second (*Myzus persicae* and *Brevicoryne brassicae*) trophic levels on *Adalia bipunctata*. *J Chem Ecol* 27: 243–256.
56. Barbosa P, Gross P, Kemper J (1991) Influence of plant allelochemicals on the tobacco hornworm and its parasitoid, *Cotesia congregata*. *Ecology* 72: 1567–1575.
57. Hunter MD (2003) Effects of plant quality on the population ecology of parasitoids. *Ecol Lett* 5: 1–8.
58. Pfisterer AB, Diemer M, Schmid B (2003) Dietary shift and lowered biomass gain of a generalist herbivore in species-poor experimental plant communities. *Oecologia* 135: 234–241.
59. Cohen JE, Jonsson T, Muller CB, Godfray HCJ, Savage VM (2005) Body sizes of hosts and parasitoids in individual feeding relationships. *Proceedings of the National Academy of Sciences* 102: 684–689.
60. Bühler C, Schmid B (2001) The influence of management regime and altitude on the population structure of *Succisa pratensis*: implications for vegetation monitoring. *J Appl Ecol* 38: 689–698.
